# Supplementary material
Source: PubMed Central journal article supplement (PMC4394388)

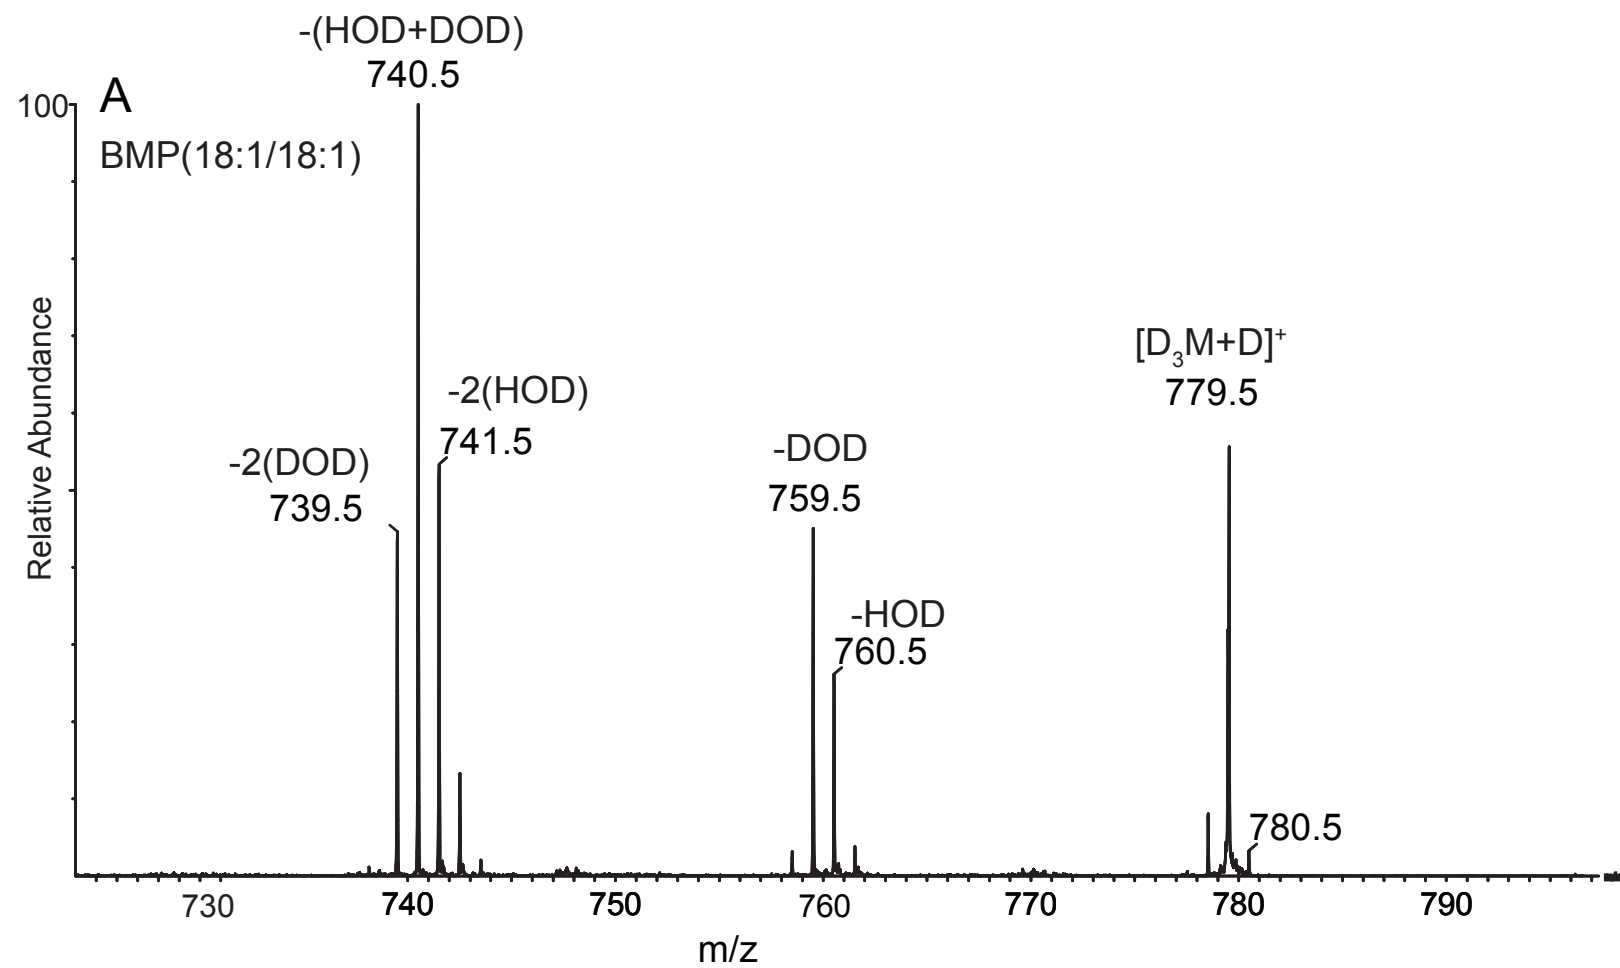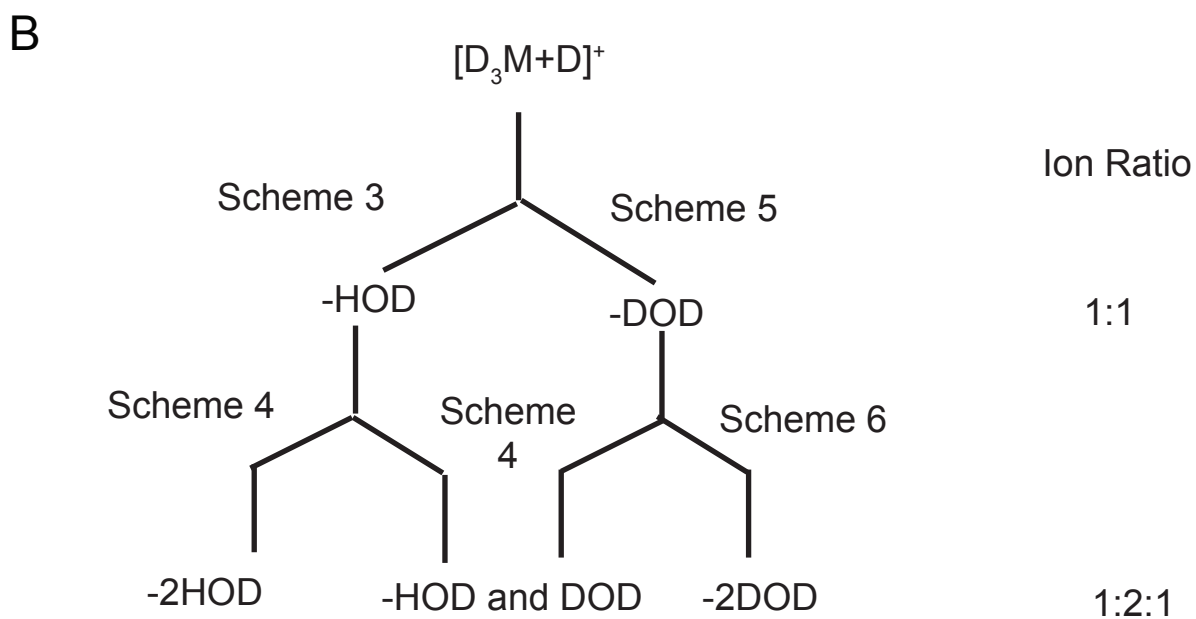

Supplement: NIHMS626361-supplement-1.pdf [file NIHMS626361-supplement-1.pdf]

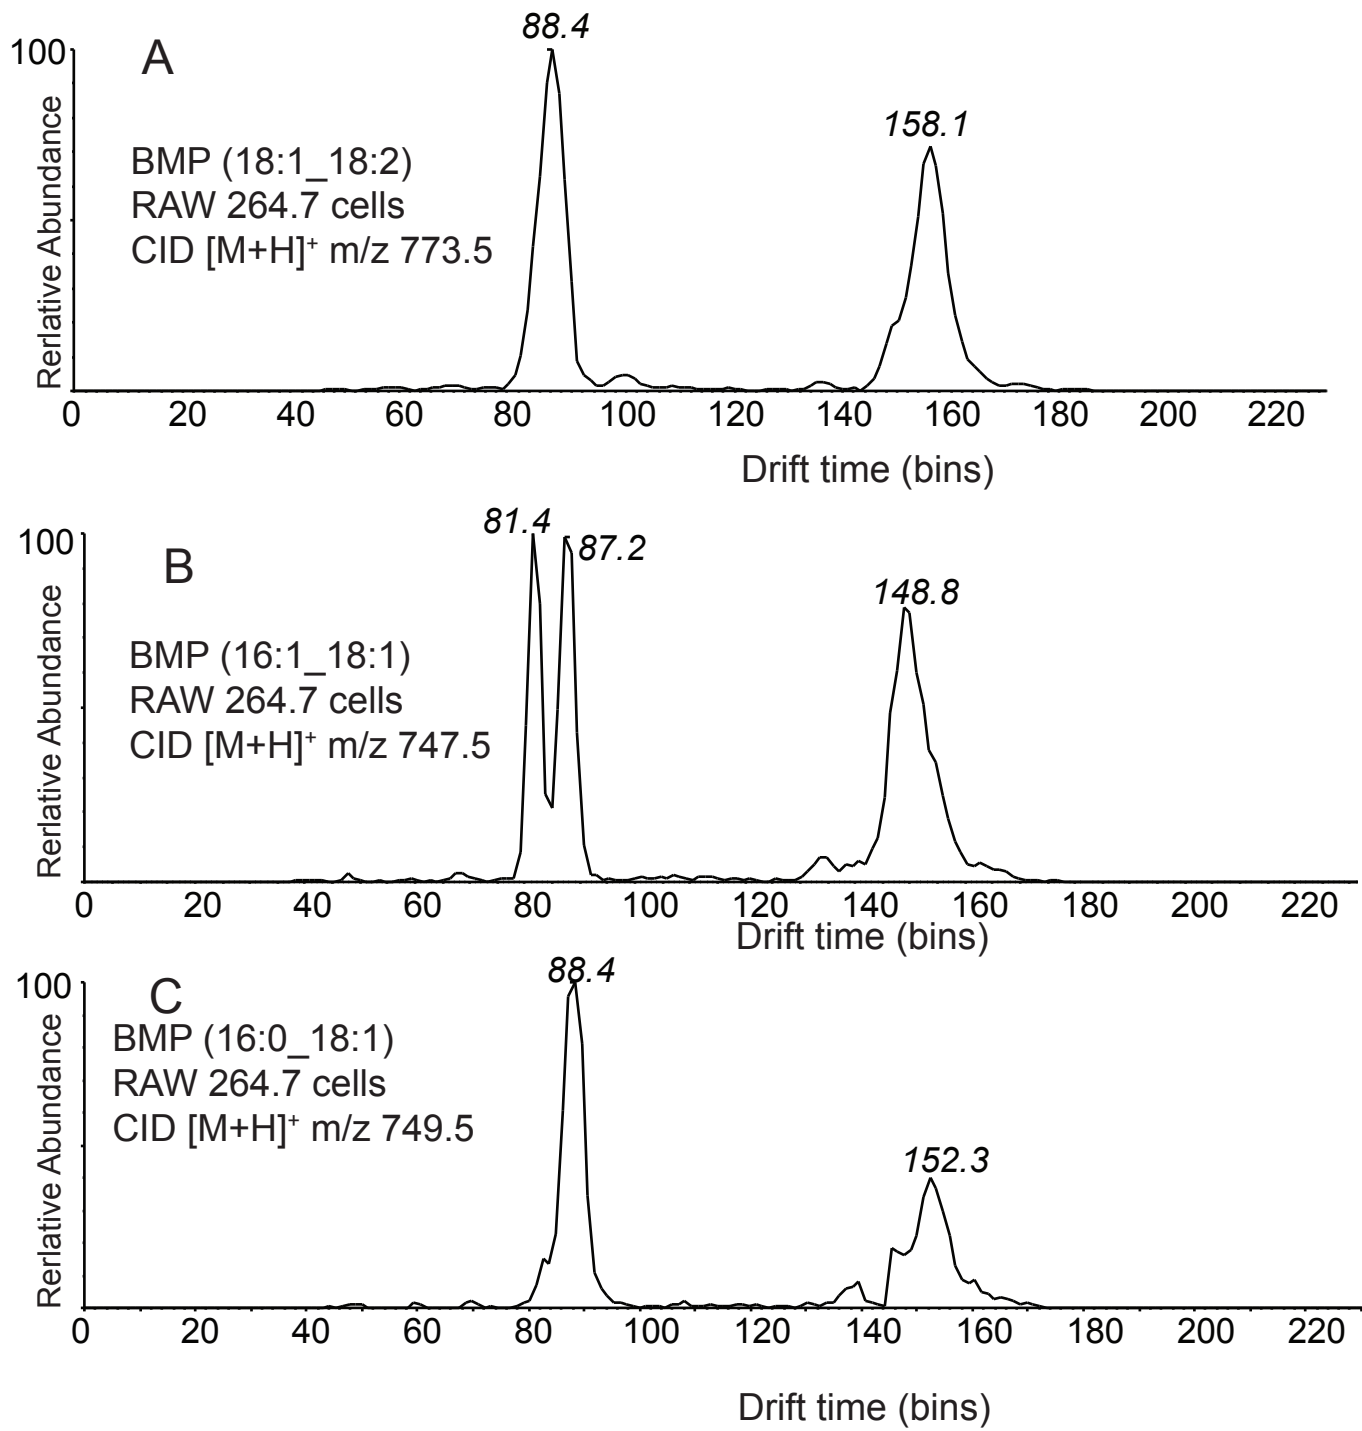

Supplementary Figure 5

Supplement: NIHMS626361-supplement-2.pdf [file NIHMS626361-supplement-2.pdf]

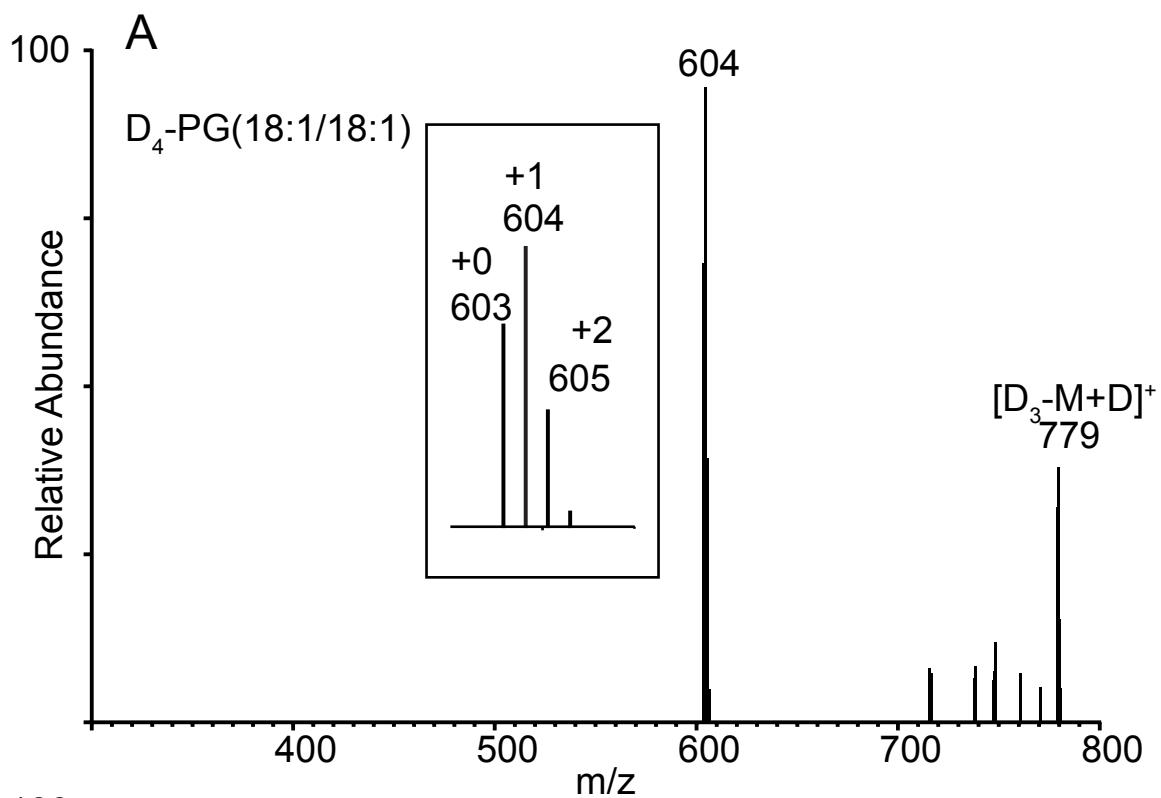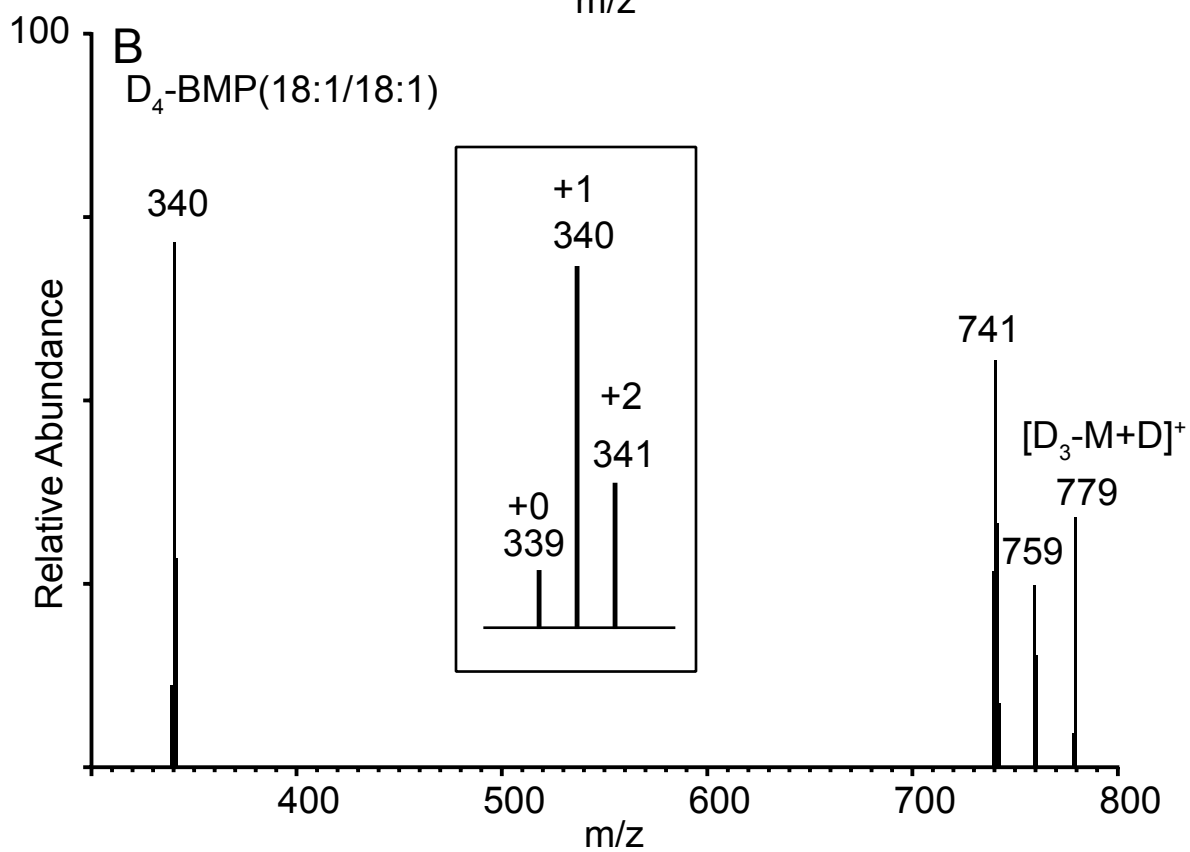

Supplement: NIHMS626361-supplement-4.pdf [file NIHMS626361-supplement-4.pdf]

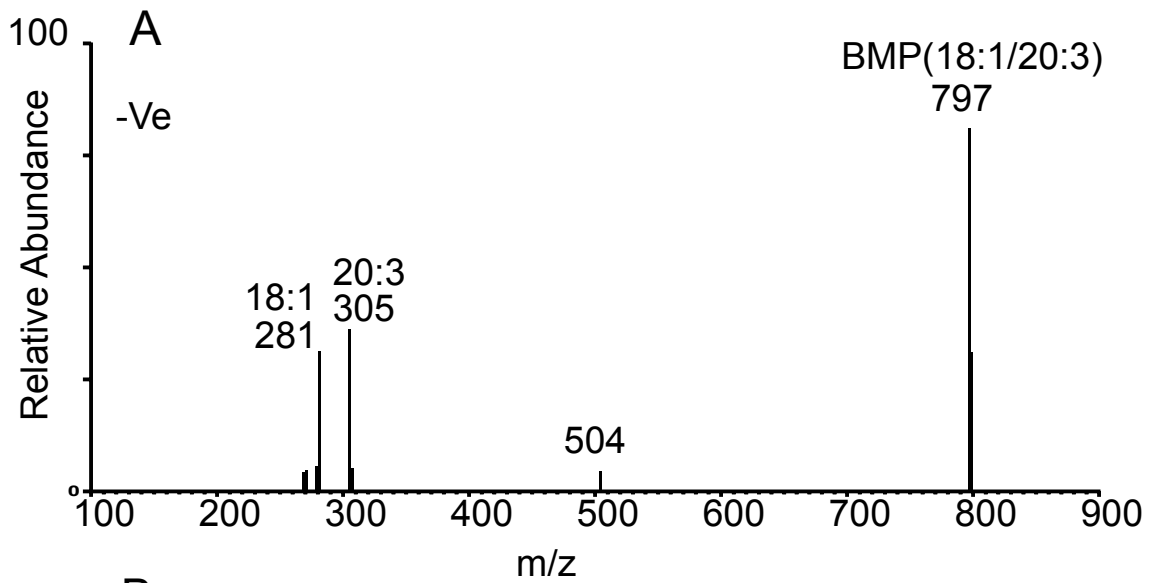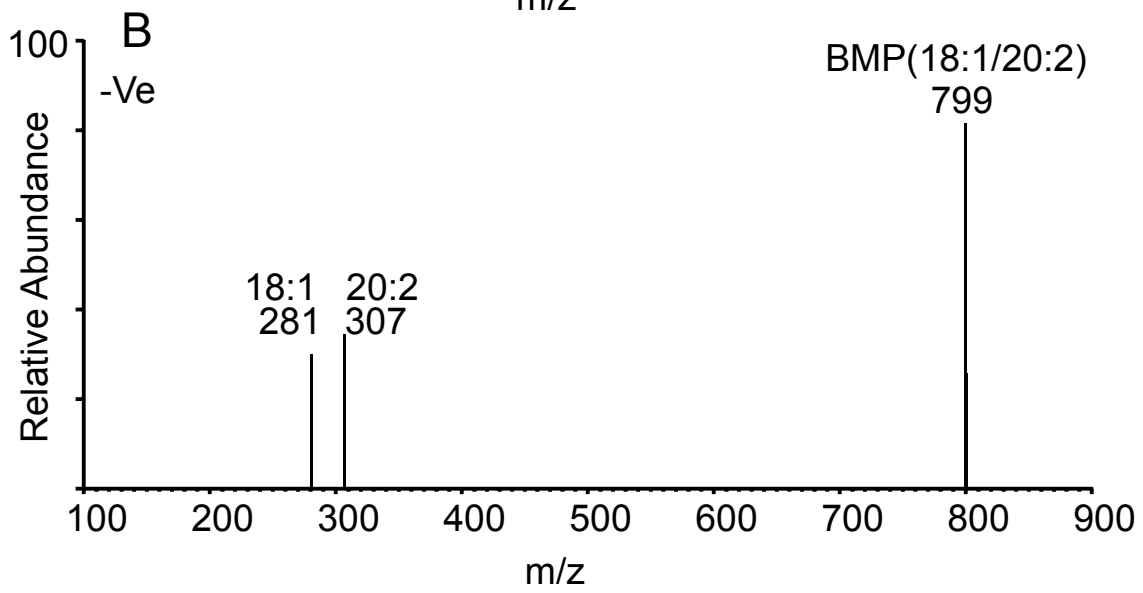

Supplemental Figure 3

Supplement: NIHMS626361-supplement-5.pdf [file NIHMS626361-supplement-5.pdf]

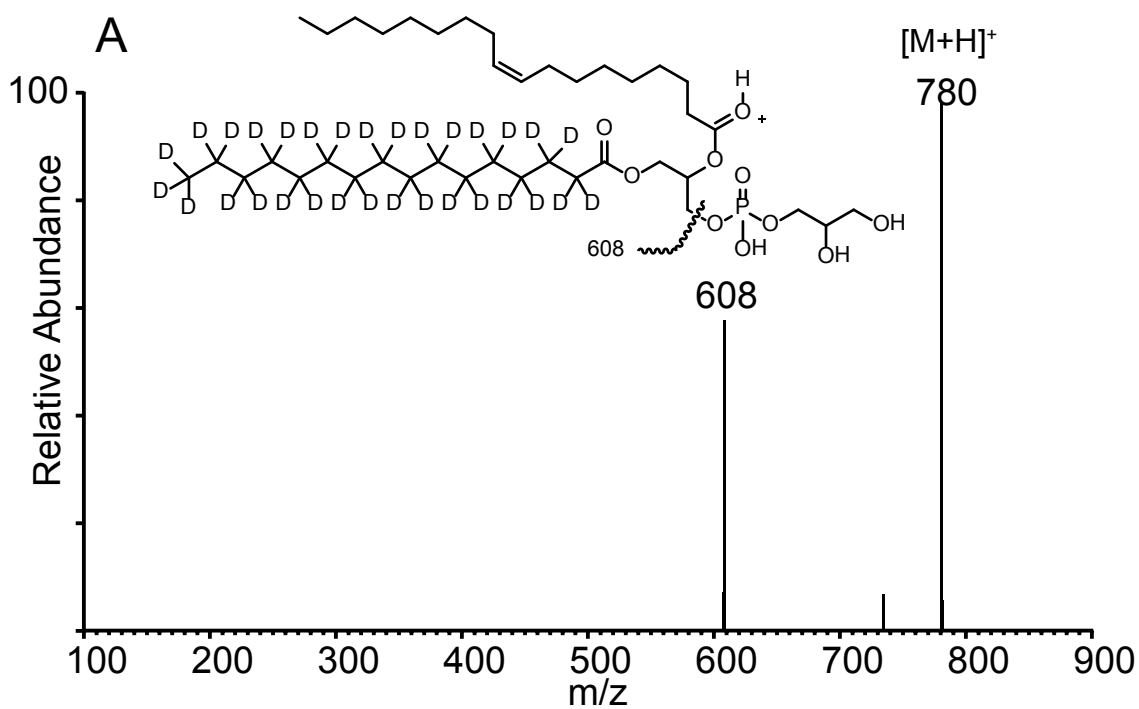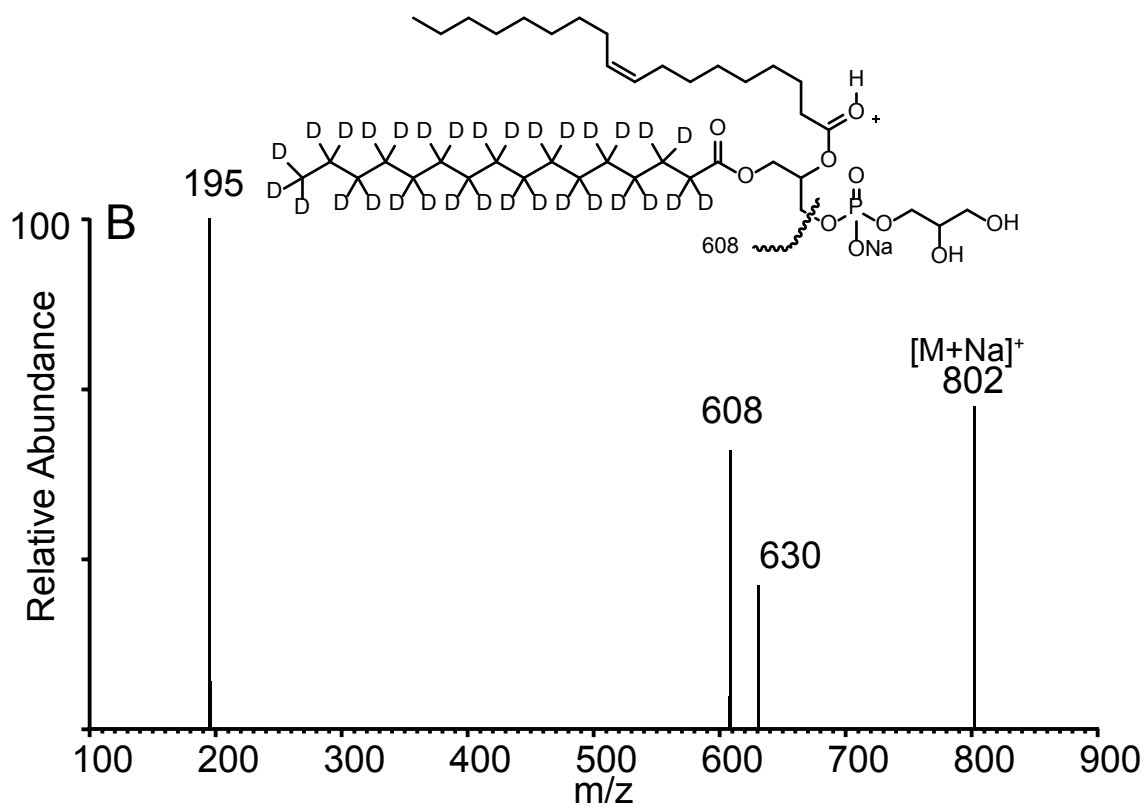

Supplement: NIHMS626361-supplement-6.pdf [file NIHMS626361-supplement-6.pdf]
